# Supplementary material
Source: publisher figshare collection journal article supplement (https://karger.figshare.com/ndownloader/files/17616746)
Supplement: Supplementary file 1 [file 17616746]

| **Supplemental Table 2.** The outcomes of mean serum sodium reduction rate, filter and patient mortality in the matched cohort | | | | |
| --- | --- | --- | --- | --- |
| Variables | No-anticoagulation  (n = 18) | RCA  (n = 18) | P value |
| Mean hypernatremia correction rates (mEq/L/h) | 0.94 ± 0.41 | 0.86 ± 0.36 | 0.569 |
| Estimated median survival time of the first circuit, ( 95% CI ) | 15.0 (1.5-28.5) | >72 | <0.001 |
| Estimated median survival time of all circuit, ( 95% CI ) | 18.5 (14.5-22.5) | >72 | <0.001 |
| Number of filter, median (range) | 2 (1, 4) | 1 (1, 2) | 0.002 |
| Filter failure percent (n, %) | 61.1% (11/18) | 5.6% (1/18) | 0.001 |
| Mortality rate, n (%) | 15（83.3%） | 15（83.3%） | 1.0 |
